# Supplementary material for: Gills versus kidney for ionoregulation in the obligate air-breathingArapaima gigas, a fish with a kidney in its air-breathing organ
Source: Oxford University Press journal article supplement (doi:10.1242/jeb.232694), 2020-01-01
Supplement: jeb232694supp.pdf [file jeb232694supp.pdf]

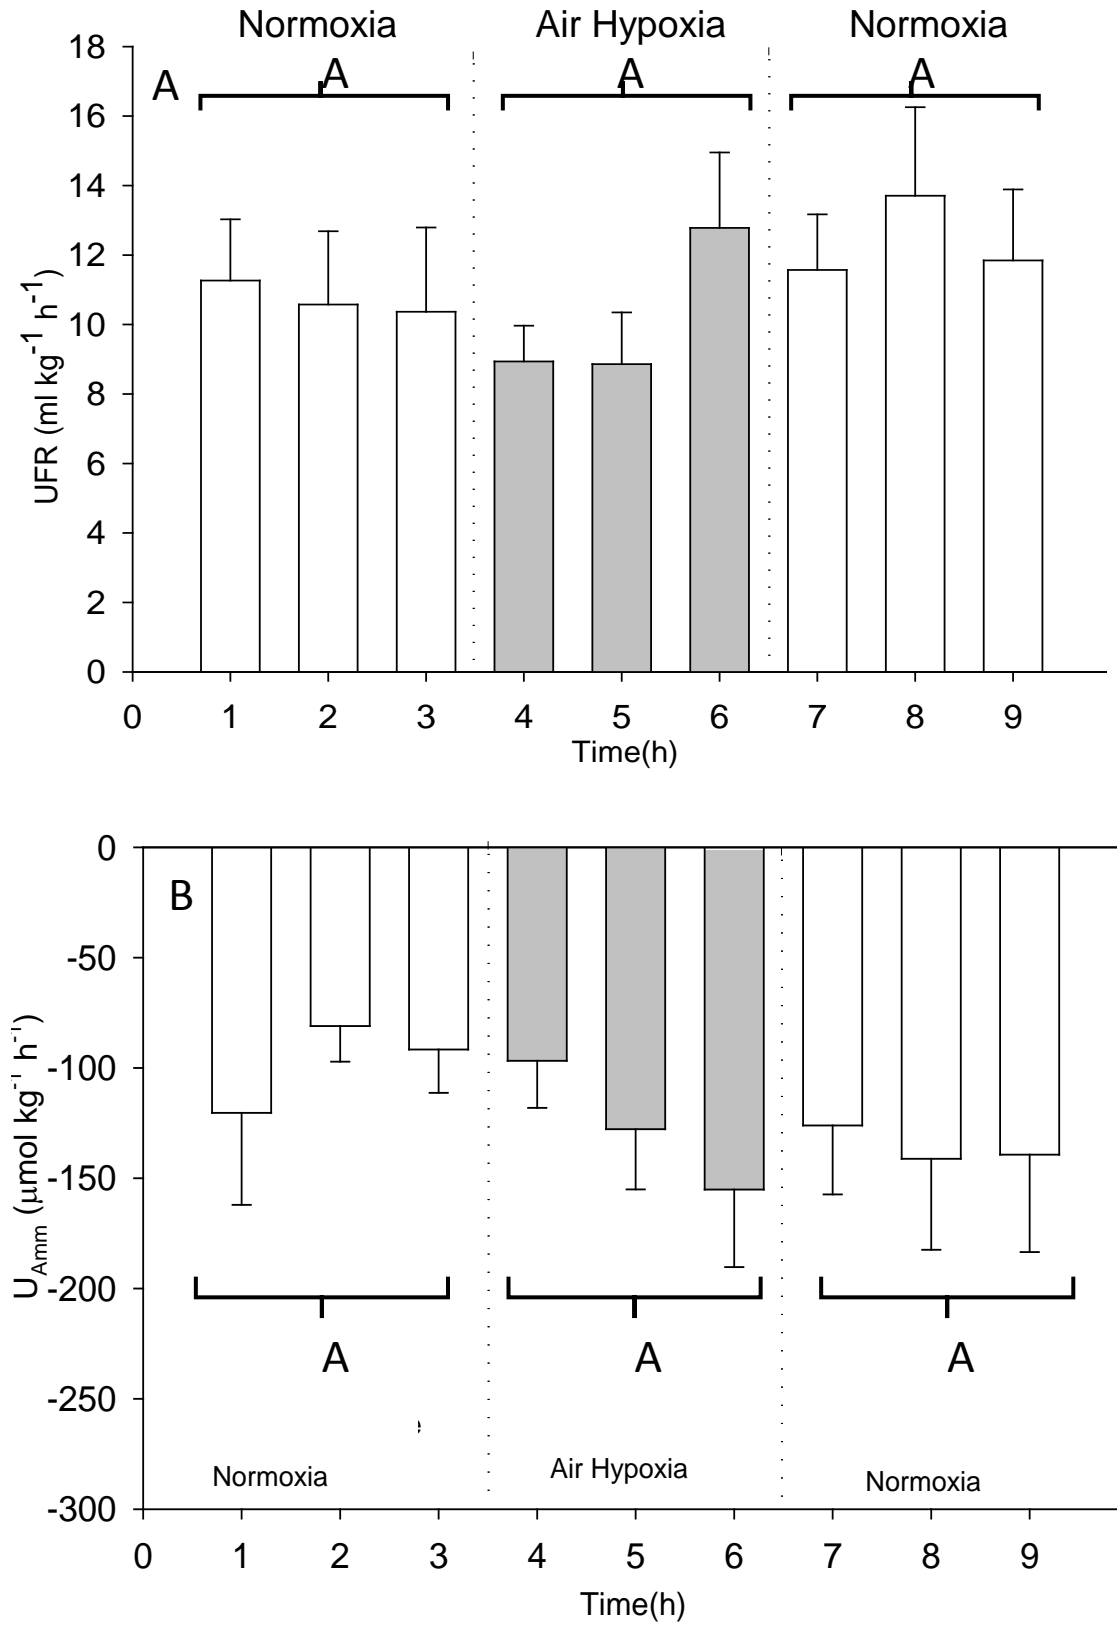

Supplementary Fig. S1

**Fig. S1.** The effect of **aerial hypoxia** (aquatic normoxia) on (A) urine flow rate (UFR) and (B) urinary excretion rate of total ammonia ( $U_{\text{Amm}}$ ) in *A. gigas*. Aerial hypoxia was applied during a 3-h experimental treatment period, following a 3-h normoxic control period, and was followed by a 3-h normoxic recovery period. Measurements were made over 1-h intervals. Means  $\pm$  SEM ( $N = 9$ ). There were no significant differences (i.e.  $P > 0.05$ ) among the overall means of the 3-h periods, nor were any of the means in the 1-h intervals significantly different from the overall normoxic control mean (i.e.  $P > 0.05$ ).

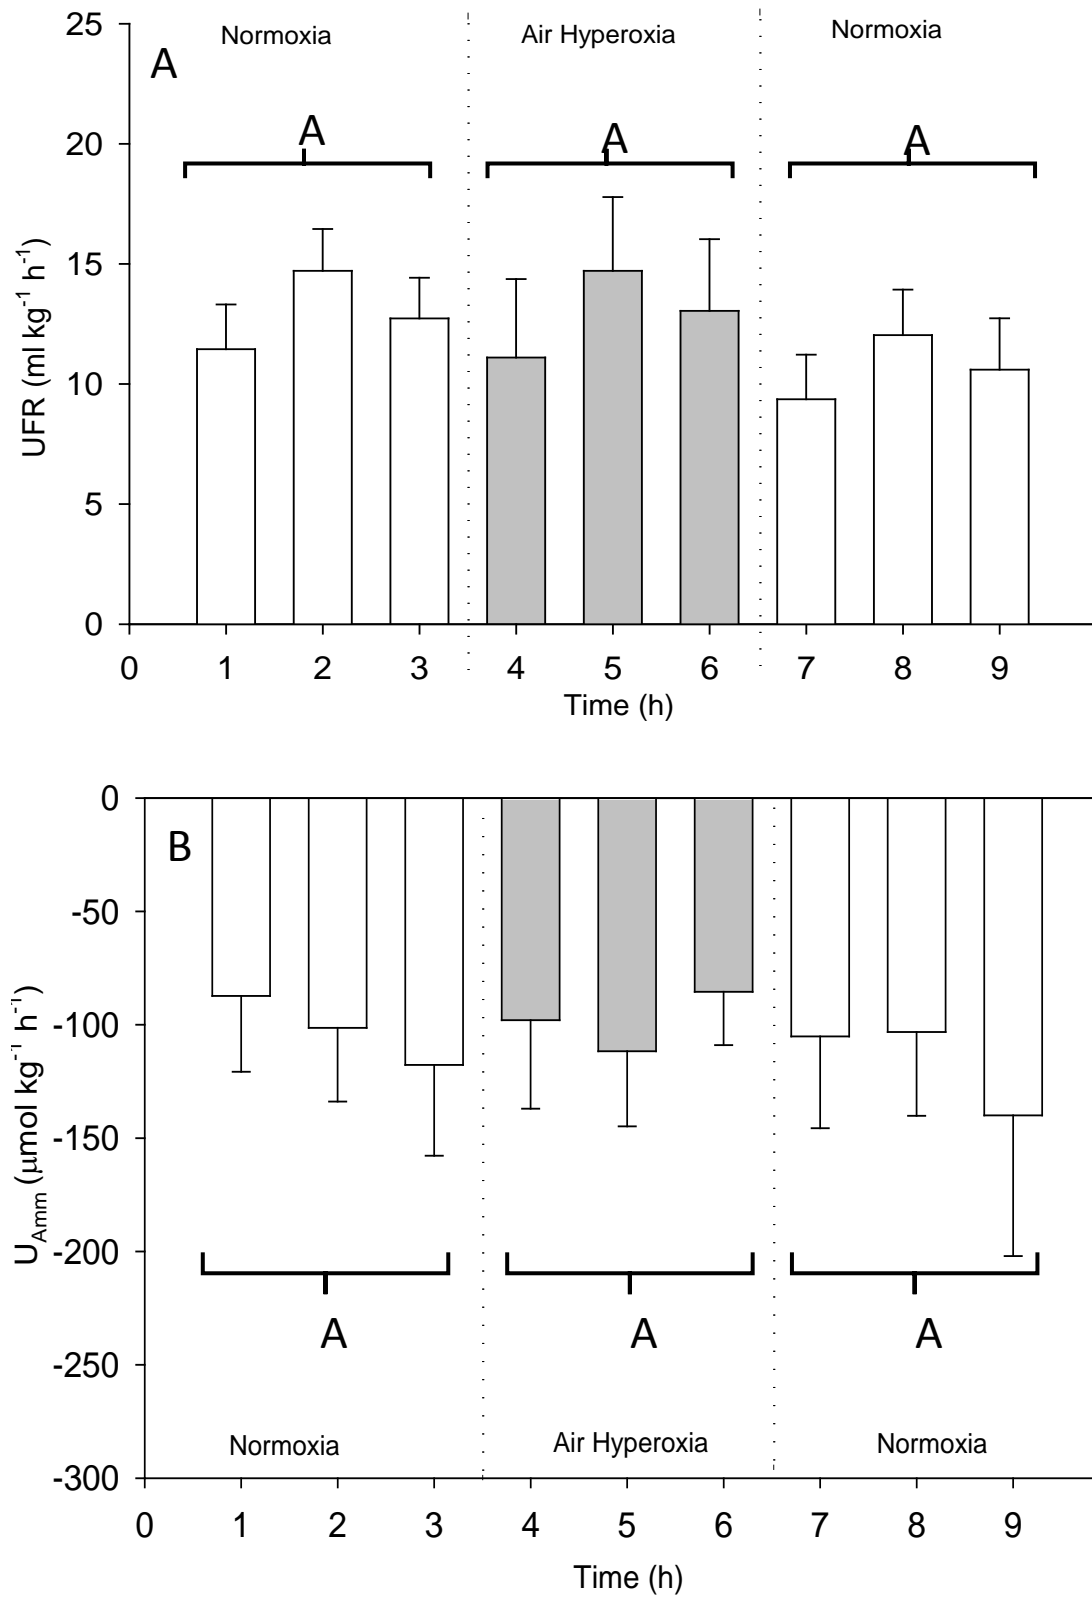

Supplementary Fig. S2

**Fig. S2.** The effect of **aerial hyperoxia** (aquatic normoxia) on (A) urine flow rate (UFR) and (B) urinary excretion rate of total ammonia ( $U_{\text{Amm}}$ ) in *A. gigas*. Aerial hyperoxia was applied during a 3-h experimental treatment period, following a 3-h normoxic control period, and was followed by a 3-h normoxic recovery period. Measurements were made over 1-h intervals. Means  $\pm$  SEM (N = 9). There were no significant differences (i.e.  $P > 0.05$ ) among the overall means of the 3-h periods, nor were any of the means in the 1-h intervals significantly different from the overall normoxic control mean (i.e.  $P > 0.05$ ).

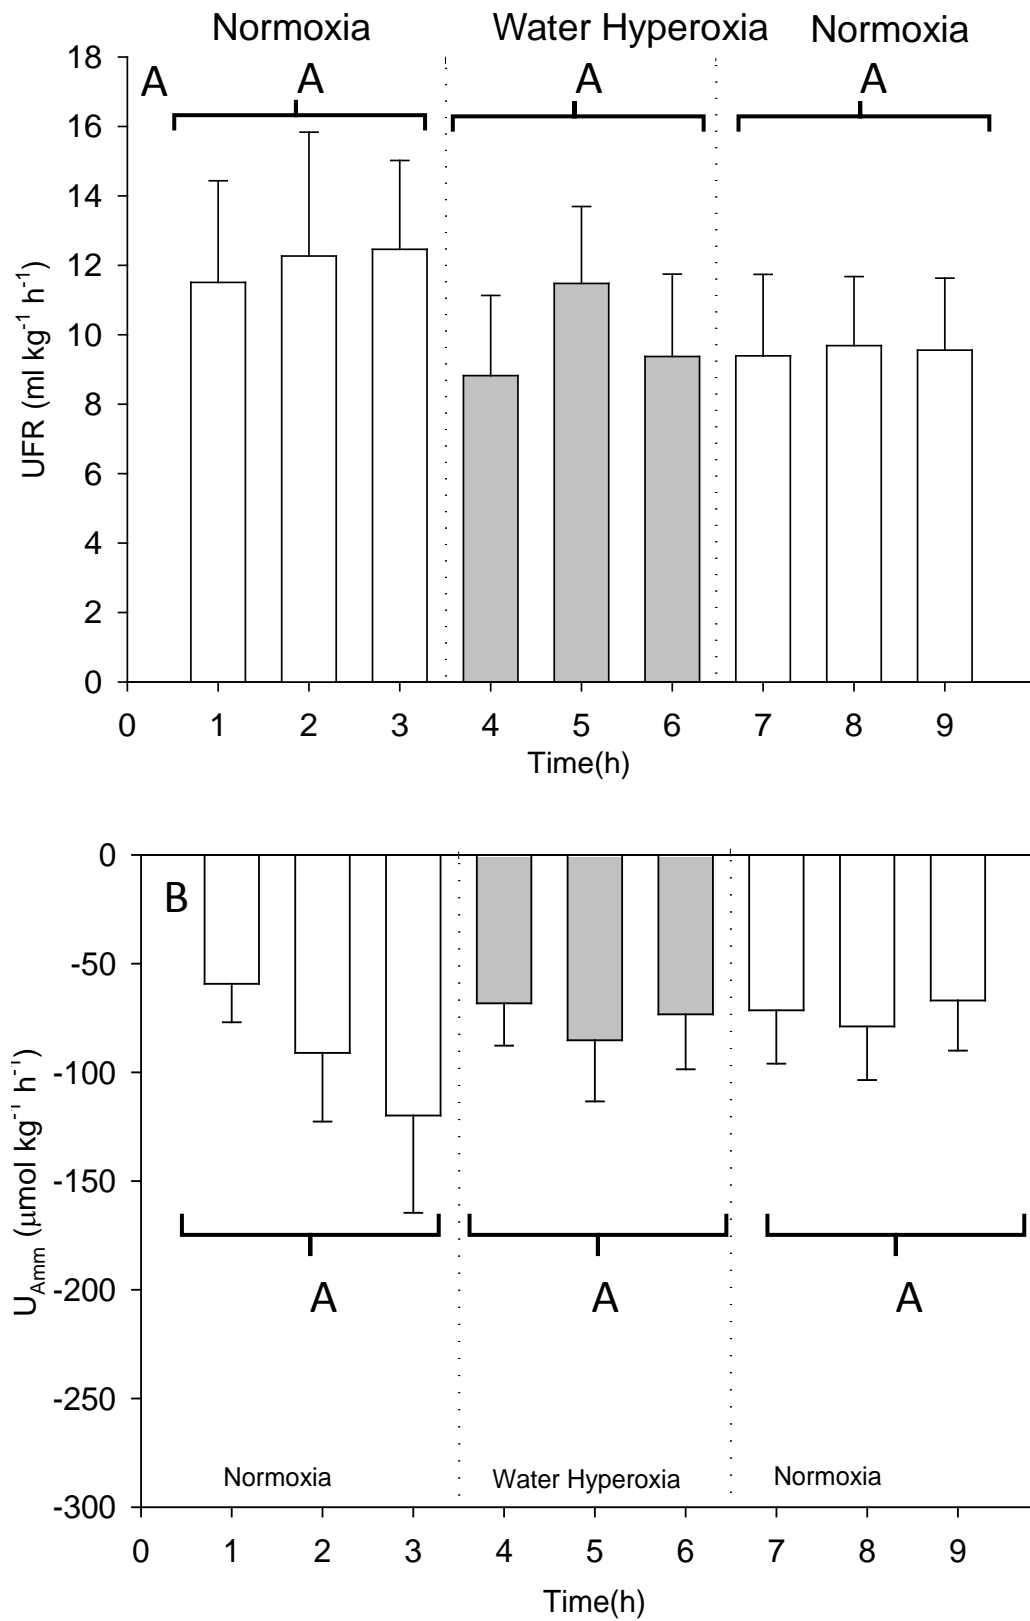

Supplementary Fig. S3

**Fig. S3.** The effect of **aquatic hyperoxia** (aerial normoxia) on (A) urine flow rate (UFR) and (B) urinary excretion rate of total ammonia ( $U_{\text{Amm}}$ ) in *A. gigas*. Aquatic hyperoxia was applied during a 3-h experimental treatment period, following a 3-h normoxic control period, and was followed by a 3-h normoxic recovery period. Measurements were made over 1-h intervals. Means  $\pm$  SEM (N = 9). There were no significant differences (i.e.  $P > 0.05$ ) among the overall means of the 3-h periods, nor were any of the means in the 1-h intervals significantly different from the overall normoxic control mean (i.e.  $P > 0.05$ ).

### Supplementary Table S1

Urine composition and flow rate (UFR) in *A. gigas* under control day-time conditions. Means  $\pm$  SEM (N = 29 measurements on 11 animals).

|                                                         |                  |
|---------------------------------------------------------|------------------|
| [Na <sup>+</sup> ] <sub>u</sub> (mmol L <sup>-1</sup> ) | 0.22 $\pm$ 0.06  |
| [K <sup>+</sup> ] <sub>u</sub> (mmol L <sup>-1</sup> )  | 0.10 $\pm$ 0.01  |
| [Cl <sup>-</sup> ] <sub>u</sub> (mmol L <sup>-1</sup> ) | 0.17 $\pm$ 0.03  |
| [Total Ammonia] <sub>u</sub> (mmol L <sup>-1</sup> )    | 10.81 $\pm$ 1.37 |
| [Urea-N] <sub>u</sub> (mmol-N L <sup>-1</sup> )         | 6.79 $\pm$ 1.58  |
| Urine Flow Rate (ml kg <sup>-1</sup> h <sup>-1</sup> )  | 12.23 $\pm$ 1.05 |

## Supplementary Table S2

A. Pearson's correlation coefficients for plasma components of *A. gigas* (N = 8). The one significant correlation is highlighted in bold.

|                                 | [Total CO <sub>2</sub> ] <sub>p</sub> | [Ammonia] <sub>p</sub> | [Urea-N] <sub>p</sub> | [Cl <sup>-</sup> ] <sub>p</sub> | [Na <sup>+</sup> ] <sub>p</sub> |
|---------------------------------|---------------------------------------|------------------------|-----------------------|---------------------------------|---------------------------------|
| [Ammonia] <sub>p</sub>          | <b>-0.738*</b>                        |                        |                       |                                 |                                 |
| [Urea-N] <sub>p</sub>           | -0.581                                | 0.276                  |                       |                                 |                                 |
| [Cl <sup>-</sup> ] <sub>p</sub> | -0.354                                | 0.178                  | 0.101                 |                                 |                                 |
| [Na <sup>+</sup> ] <sub>p</sub> | -0.429                                | 0.280                  | 0.272                 | 0.611                           |                                 |
| [K <sup>+</sup> ] <sub>p</sub>  | 0.175                                 | -0.600                 | 0.322                 | -0.350                          | -0.115                          |

\*P < 0.05

B. Pearson's correlation coefficients for components of overnight urine collections of *A. gigas* (N = 28 collections from 11 fish). Significant correlations are highlighted in bold.

|                         | UFR    | [TotalCO <sub>2</sub> ] | [Amm]         | [Urea-N] | [Cl <sup>-</sup> ] | [Na <sup>+</sup> ] |
|-------------------------|--------|-------------------------|---------------|----------|--------------------|--------------------|
| [TotalCO <sub>2</sub> ] | 0.167  |                         |               |          |                    |                    |
| [Amm]                   | 0.112  | <b>0.645***</b>         |               |          |                    |                    |
| [Urea-N]                | 0.056  | <b>0.420*</b>           | 0.281         |          |                    |                    |
| [Cl <sup>-</sup> ]      | 0.142  | 0.056                   | 0.213         | -0.156   |                    |                    |
| [Na <sup>+</sup> ]      | -0.196 | 0.171                   | -0.210        | 0.089    | 0.146              |                    |
| [K <sup>+</sup> ]       | -0.107 | <b>0.748***</b>         | <b>0.400*</b> | 0.160    | -0.086             | <b>0.506**</b>     |

\*P < 0.05, \*\*P < 0.01, \*\*\*P < 0.001



## Supplementary Table S3

A. Urinary concentrations (mmol L<sup>-1</sup>) of Na<sup>+</sup> ([Na<sup>+</sup>]<sub>u</sub>), K<sup>+</sup> ([K<sup>+</sup>]<sub>u</sub>), Cl<sup>-</sup> ([Cl<sup>-</sup>]<sub>u</sub>), total ammonia ([Amm]<sub>u</sub>), and urea-N ([Urea-N]<sub>u</sub>) of *A. gigas* subjected to **aerial hypoxia** (aquatic normoxia) during the experimental treatment period. Hourly values, as well as mean values (in bold) for the 3-h pre-treatment control period, 3-h treatment period, and 3-h post-treatment recovery period are shown. Means ± SEM (N). Overall means in 3-h periods not sharing the same letter are significantly different (P < 0.05).

|                                 | 0-1h<br>Control | 1-2h<br>Control | 2-3h<br>Control | <b>Mean<br/>Control</b> | 3-4h<br>Aerial<br>Hypoxia | 4-5h<br>Aerial<br>Hypoxia | 5-6h<br>Aerial<br>Hypoxia | <b>Mean<br/>Aerial<br/>Hypoxia</b> | 6-7h<br>Recovery | 7-8h<br>Recovery | 8-9h<br>Recovery | <b>Mean<br/>Recovery</b> |
|---------------------------------|-----------------|-----------------|-----------------|-------------------------|---------------------------|---------------------------|---------------------------|------------------------------------|------------------|------------------|------------------|--------------------------|
| [Na <sup>+</sup> ] <sub>u</sub> | 0.29            | 0.36            | 0.36            | <b>0.34<sup>A</sup></b> | 0.17                      | 0.15                      | 0.16                      | <b>0.16<sup>B</sup></b>            | 0.17             | 0.11*            | 0.29             | <b>0.19<sup>B</sup></b>  |
| SEM (8)                         | 0.16            | 0.20            | 0.20            | <b>0.19</b>             | 0.07                      | 0.05                      | 0.08                      | <b>0.07</b>                        | 0.09             | 0.02             | 0.21             | <b>0.10</b>              |
| [K <sup>+</sup> ] <sub>u</sub>  | 0.09            | 0.10            | 0.12            | <b>0.10</b>             | 0.14                      | 0.12                      | 0.07                      | <b>0.11</b>                        | 0.10             | 0.10             | 0.10             | <b>0.10</b>              |
| SEM (8)                         | 0.01            | 0.02            | 0.03            | <b>0.02</b>             | 0.05                      | 0.04                      | 0.01                      | <b>0.03</b>                        | 0.03             | 0.03             | 0.03             | <b>0.03</b>              |
| [Cl <sup>-</sup> ] <sub>u</sub> | 0.22            | 0.21            | 0.23            | <b>0.22</b>             | 0.13                      | 0.16                      | 0.17                      | <b>0.15</b>                        | 0.12             | 0.12             | 0.12             | <b>0.12</b>              |
| SEM (8)                         | 0.09            | 0.08            | 0.08            | <b>0.08</b>             | 0.03                      | 0.06                      | 0.05                      | <b>0.04</b>                        | 0.02             | 0.02             | 0.02             | <b>0.02</b>              |
| [Amm] <sub>u</sub>              | 12.10           | 9.20            | 11.12           | <b>10.81</b>            | 11.20                     | 12.70                     | 14.07                     | <b>12.66</b>                       | 12.01            | 11.83            | 12.60            | <b>12.15</b>             |
| SEM (8)                         | 3.32            | 1.66            | 2.14            | <b>2.09</b>             | 2.71                      | 2.66                      | 2.89                      | <b>2.68</b>                        | 2.72             | 2.87             | 2.77             | <b>2.64</b>              |
| [Urea-N] <sub>u</sub>           | 0.78            | 0.80            | 0.92            | <b>0.83</b>             | 0.77                      | 0.85                      | 0.78                      | <b>0.80</b>                        | 0.84             | 0.89             | 0.78             | <b>0.84</b>              |
| SEM (8)                         | 0.23            | 0.22            | 0.24            | <b>0.21</b>             | 0.23                      | 0.23                      | 0.23                      | <b>0.23</b>                        | 0.24             | 0.26             | 0.24             | <b>0.25</b>              |

B. Urinary concentrations (mmol L<sup>-1</sup>) of Na<sup>+</sup> ([Na<sup>+</sup>]<sub>u</sub>), K<sup>+</sup> ([K<sup>+</sup>]<sub>u</sub>), Cl<sup>-</sup> ([Cl<sup>-</sup>]<sub>u</sub>), total ammonia ([Amm]<sub>u</sub>), and urea-N ([Urea-N]<sub>u</sub>) of *A. gigas* subjected to **aerial hyperoxia** (aquatic normoxia) during the experimental treatment period. Hourly values, as well as mean values (in bold) for the 3-h pre-treatment control period, 3-h treatment period, and 3-h post-treatment recovery period are shown. Means ± SEM (N).

|                                 | 0-1h<br>Control | 1-2h<br>Control | 2-3h<br>Control | <b>Mean<br/>Control</b> | 3-4h<br>Aerial<br>Hyperoxia | 4-5h<br>Aerial<br>Hyperoxia | 5-6h<br>Aerial<br>Hyperoxia | <b>Mean<br/>Aerial<br/>Hyperoxia</b> | 6-7h<br>Recovery | 7-8h<br>Recovery | 8-9h<br>Recovery | <b>Mean<br/>Recovery</b> |
|---------------------------------|-----------------|-----------------|-----------------|-------------------------|-----------------------------|-----------------------------|-----------------------------|--------------------------------------|------------------|------------------|------------------|--------------------------|
| [Na <sup>+</sup> ] <sub>u</sub> | 0.19            | 0.15            | 0.17            | <b>0.17</b>             | 0.18                        | 0.15                        | 0.13                        | <b>0.15</b>                          | 0.12             | 0.14             | 0.12             | <b>0.13</b>              |
| SEM (5)                         | 0.03            | 0.05            | 0.06            | <b>0.03</b>             | 0.06                        | 0.05                        | 0.04                        | <b>0.05</b>                          | 0.04             | 0.06             | 0.04             | <b>0.05</b>              |
| [K <sup>+</sup> ] <sub>u</sub>  | 0.08            | 0.06            | 0.07            | <b>0.07</b>             | 0.07                        | 0.06                        | 0.06                        | <b>0.06</b>                          | 0.06             | 0.07             | 0.07             | <b>0.07</b>              |
| SEM (5)                         | 0.01            | 0.02            | 0.02            | <b>0.02</b>             | 0.02                        | 0.02                        | 0.01                        | <b>0.02</b>                          | 0.01             | 0.02             | 0.01             | <b>0.01</b>              |
| [Cl <sup>-</sup> ] <sub>u</sub> | 0.09            | 0.08            | 0.08            | <b>0.08</b>             | 0.08                        | 0.07                        | 0.08                        | <b>0.08</b>                          | 0.08             | 0.08             | 0.09             | <b>0.08</b>              |
| SEM (5)                         | 0.01            | 0.01            | 0.01            | <b>0.00</b>             | 0.01                        | 0.01                        | 0.01                        | <b>0.01</b>                          | 0.01             | 0.01             | 0.01             | <b>0.01</b>              |
| [Amm] <sub>u</sub>              | 9.13            | 7.15            | 10.30           | <b>8.86</b>             | 11.35                       | 12.40                       | 9.25                        | <b>10.35</b>                         | 10.27            | 10.12            | 12.89            | <b>11.10</b>             |
| SEM (5)                         | 3.80            | 2.74            | 4.20            | <b>3.24</b>             | 4.50                        | 4.40                        | 3.86                        | <b>4.17</b>                          | 4.04             | 4.10             | 5.23             | <b>4.42</b>              |
| [Urea-N] <sub>u</sub>           | 0.50            | 0.63            | 0.77            | <b>0.63</b>             | 0.84                        | 0.83                        | 0.82                        | <b>0.83</b>                          | 0.86             | 0.92             | 0.71             | <b>0.83</b>              |
| SEM (5)                         | 0.31            | 0.29            | 0.32            | <b>0.31</b>             | 0.34                        | 0.34                        | 0.33                        | <b>0.34</b>                          | 0.34             | 0.28             | 0.33             | <b>0.31</b>              |

C. Urinary concentrations (mmol L<sup>-1</sup>) of Na<sup>+</sup> ([Na<sup>+</sup>]<sub>u</sub>), K<sup>+</sup> ([K<sup>+</sup>]<sub>u</sub>), Cl<sup>-</sup> ([Cl<sup>-</sup>]<sub>u</sub>), total ammonia ([Amm]<sub>u</sub>), and urea-N ([Urea-N]<sub>u</sub>) of *A. gigas* subjected to **aquatic hypoxia** (aerial normoxia) during the experimental treatment period. Hourly values, as well as mean values (in bold) for the 3-h pre-treatment control period, 3-h treatment period, and 3-h post-treatment recovery period are shown. Means ± SEM (N). \* indicates significant difference from mean Control value (P < 0.05).

|                                 | 0-1h<br>Control | 1-2h<br>Control | 2-3h<br>Control | <b>Mean<br/>Control</b> | 3-4h<br>Aquatic<br>Hypoxia | 4-5h<br>Aquatic<br>Hypoxia | 5-6h<br>Aquatic<br>Hypoxia | <b>Mean<br/>Aquatic<br/>Hypoxia</b> | 6-7h<br>Recovery | 7-8h<br>Recovery | 8-9h<br>Recovery | <b>Mean<br/>Recovery</b> |
|---------------------------------|-----------------|-----------------|-----------------|-------------------------|----------------------------|----------------------------|----------------------------|-------------------------------------|------------------|------------------|------------------|--------------------------|
| [Na <sup>+</sup> ] <sub>u</sub> | 0.24            | 0.14            | 0.16            | <b>0.15</b>             | 0.19                       | 0.16                       | 0.15                       | <b>0.17</b>                         | 0.17             | 0.25             | 0.26             | <b>0.23</b>              |
| SEM (9)                         | 0.04            | 0.04            | 0.04            | <b>0.04</b>             | 0.06                       | 0.04                       | 0.04                       | <b>0.04</b>                         | 0.04             | 0.11             | 0.09             | <b>0.07</b>              |
| [K <sup>+</sup> ] <sub>u</sub>  | 0.09            | 0.11            | 0.19            | <b>0.13</b>             | 0.11                       | 0.08*                      | 0.07*                      | <b>0.09</b>                         | 0.09             | 0.08*            | 0.10             | <b>0.09</b>              |
| SEM (9)                         | 0.01            | 0.02            | 0.09            | <b>0.03</b>             | 0.02                       | 0.01                       | 0.01                       | <b>0.01</b>                         | 0.02             | 0.01             | 0.01             | <b>0.01</b>              |
| [Cl <sup>-</sup> ] <sub>u</sub> | 0.18            | 0.17            | 0.18            | <b>0.18</b>             | 0.25                       | 0.21                       | 0.19                       | <b>0.22</b>                         | 0.16             | 0.21             | 0.19             | <b>0.18</b>              |
| SEM (9)                         | 0.02            | 0.02            | 0.05            | <b>0.02</b>             | 0.07                       | 0.04                       | 0.04                       | <b>0.04</b>                         | 0.04             | 0.03             | 0.03             | <b>0.03</b>              |
| [Amm] <sub>u</sub>              | 11.93           | 12.94           | 11.93           | <b>13.64</b>            | 11.02                      | 14.91                      | 13.08                      | <b>12.72</b>                        | 14.33            | 11.31            | 12.29            | <b>12.64</b>             |
| SEM (9)                         | 3.41            | 3.58            | 3.05            | <b>3.04</b>             | 3.12                       | 4.67                       | 4.12                       | <b>3.86</b>                         | 4.08             | 2.86             | 3.29             | <b>3.32</b>              |
| [Urea-N] <sub>u</sub>           | 0.34            | 0.54            | 0.47            | <b>0.45</b>             | 0.56                       | 0.54                       | 0.41                       | <b>0.50</b>                         | 0.56             | 0.55             | 0.82             | <b>0.64</b>              |
| SEM (9)                         | 0.20            | 0.25            | 0.22            | <b>0.22</b>             | 0.28                       | 0.26                       | 0.21                       | <b>0.25</b>                         | 0.24             | 0.27             | 0.32             | <b>0.27</b>              |

D. Urinary concentrations (mmol L<sup>-1</sup>) of Na<sup>+</sup> ([Na<sup>+</sup>]<sub>u</sub>), K<sup>+</sup> ([K<sup>+</sup>]<sub>u</sub>), Cl<sup>-</sup> ([Cl<sup>-</sup>]<sub>u</sub>), total ammonia ([Amm]<sub>u</sub>), and urea-N ([Urea-N]<sub>u</sub>) of *A. gigas* subjected to **aquatic hyperoxia** (aerial normoxia) during the experimental treatment period. Hourly values, as well as mean values (in bold) for the 3-h pre-treatment control period, 3-h treatment period, and 3-h post-treatment recovery period are shown. Means ± SEM (N).

|                                 | 0-1h<br>Control | 1-2h<br>Control | 2-3h<br>Control | <b>Mean<br/>Control</b> | 3-4h<br>Aquatic<br>Hyperoxia | 4-5h<br>Aquatic<br>Hyperoxia | 5-6h<br>Aquatic<br>Hyperoxia | <b>Mean<br/>Aquatic<br/>Hyperoxia</b> | 6-7h<br>Recovery | 7-8h<br>Recovery | 8-9h<br>Recovery | <b>Mean<br/>Recovery</b> |
|---------------------------------|-----------------|-----------------|-----------------|-------------------------|------------------------------|------------------------------|------------------------------|---------------------------------------|------------------|------------------|------------------|--------------------------|
| [Na <sup>+</sup> ] <sub>u</sub> | 0.15            | 0.14            | 0.13            | <b>0.14</b>             | 0.12                         | 0.12                         | 0.12                         | <b>0.12</b>                           | 0.13             | 0.13             | 0.13             | <b>0.13</b>              |
| SEM (7)                         | 0.13            | 0.15            | 0.03            | <b>0.10</b>             | 0.03                         | 0.03                         | 0.03                         | <b>0.03</b>                           | 0.03             | 0.03             | 0.03             | <b>0.03</b>              |
| [K <sup>+</sup> ] <sub>u</sub>  | 0.07            | 0.08            | 0.09            | <b>0.08</b>             | 0.07                         | 0.06                         | 0.07                         | <b>0.07</b>                           | 0.08             | 0.08             | 0.08             | <b>0.08</b>              |
| SEM (7)                         | 0.02            | 0.02            | 0.02            | <b>0.02</b>             | 0.02                         | 0.02                         | 0.02                         | <b>0.02</b>                           | 0.02             | 0.02             | 0.02             | <b>0.02</b>              |
| [Cl <sup>-</sup> ] <sub>u</sub> | 0.21            | 0.15            | 0.15            | <b>0.17</b>             | 0.15                         | 0.15                         | 0.16                         | <b>0.15</b>                           | 0.16             | 0.181            | 0.15             | <b>0.17</b>              |
| SEM (7)                         | 0.05            | 0.03            | 0.02            | <b>0.03</b>             | 0.03                         | 0.04                         | 0.04                         | <b>0.04</b>                           | 0.05             | 0.03             | 0.04             | <b>0.04</b>              |
| [Amm] <sub>u</sub>              | 7.34            | 10.45           | 9.19            | <b>8.99</b>             | 8.57                         | 9.61                         | 8.30                         | <b>8.29</b>                           | 9.19             | 9.41             | 7.01             | <b>8.53</b>              |
| SEM (7)                         | 2.48            | 3.27            | 2.94            | <b>2.56</b>             | 2.87                         | 3.37                         | 2.97                         | <b>3.02</b>                           | 3.44             | 3.03             | 2.60             | <b>2.83</b>              |
| [Urea-N] <sub>u</sub>           | 0.65            | 0.59            | 0.71            | <b>0.65</b>             | 0.59                         | 0.76                         | 0.60                         | <b>0.65</b>                           | 0.68             | 0.63             | 0.59             | <b>0.63</b>              |
| SEM (7)                         | 0.24            | 0.22            | 0.27            | <b>0.25</b>             | 0.23                         | 0.29                         | 0.23                         | <b>0.25</b>                           | 0.25             | 0.24             | 0.22             | <b>0.24</b>              |

E. Urinary excretion rates ( $\mu\text{mol kg}^{-1} \text{h}^{-1}$ ) of  $\text{Na}^+$  ( $U_{\text{Na}}$ ),  $\text{K}^+$  ( $U_{\text{K}}$ ),  $\text{Cl}^-$  ( $U_{\text{Cl}}$ ), total ammonia ( $U_{\text{Amm}}$ ), and urea-N ( $U_{\text{Urea-N}}$ ), and urine flow rates (UFR) of *A. gigas* subjected to **aerial hypoxia** (aquatic normoxia) during the experimental treatment period. Hourly values, as well as mean values (in bold) for the 3-h pre-treatment control period, 3-h treatment period, and 3-h post-treatment recovery period are shown. Means  $\pm$  SEM (N). Overall means in 3-h periods not sharing the same letter are significantly different ( $P < 0.05$ ).

|                     | 0-1h<br>Control | 1-2h<br>Control | 2-3h<br>Control | <b>Mean<br/>Control</b> | 3-4h<br>Aerial<br>Hypoxia | 4-5h<br>Aerial<br>Hypoxia | 5-6h<br>Aerial<br>Hypoxia | <b>Mean<br/>Aerial<br/>Hypoxia</b> | 6-7h<br>Recovery | 7-8h<br>Recovery | 8-9h<br>Recovery | <b>Mean<br/>Recovery</b> |
|---------------------|-----------------|-----------------|-----------------|-------------------------|---------------------------|---------------------------|---------------------------|------------------------------------|------------------|------------------|------------------|--------------------------|
| $U_{\text{Na}}$     | 3.65            | 4.43            | 4.06            | <b>4.05<sup>A</sup></b> | 1.61                      | 1.40                      | 2.03                      | <b>1.68<sup>B</sup></b>            | 2.12             | 1.58             | 3.05             | <b>2.25<sup>AB</sup></b> |
| SEM (8)             | 2.16            | 2.54            | 2.50            | <b>2.40</b>             | 0.73                      | 0.65                      | 0.89                      | <b>0.73</b>                        | 1.07             | 0.47             | 1.93             | <b>1.03</b>              |
| $U_{\text{K}}$      | 1.00            | 0.93            | 0.88            | <b>0.94</b>             | 1.43                      | 1.33                      | 0.79                      | <b>1.18</b>                        | 1.28             | 1.39             | 1.37             | <b>1.35</b>              |
| SEM (8)             | 0.15            | 0.22            | 0.09            | <b>0.12</b>             | 0.74                      | 0.55                      | 0.10                      | <b>0.41</b>                        | 0.48             | 0.61             | 0.62             | <b>0.57</b>              |
| $U_{\text{Cl}}$     | 2.72            | 2.25            | 1.83            | <b>2.27</b>             | 1.06                      | 1.64                      | 2.16                      | <b>1.62</b>                        | 1.43             | 1.70             | 1.43             | <b>1.52</b>              |
| SEM (8)             | 1.34            | 0.90            | 0.52            | <b>0.85</b>             | 0.20                      | 0.78                      | 0.76                      | <b>0.49</b>                        | 0.37             | 0.51             | 0.36             | <b>0.41</b>              |
| $U_{\text{Amm}}$    | 120.40          | 81.03           | 91.67           | <b>97.70</b>            | 96.75                     | 127.77                    | 155.14                    | <b>126.55</b>                      | 126.10           | 141.16           | 139.29           | <b>135.52</b>            |
| SEM (8)             | 41.68           | 16.11           | 19.61           | <b>18.45</b>            | 21.32                     | 27.26                     | 35.11                     | <b>26.24</b>                       | 31.23            | 41.23            | 44.16            | <b>36.81</b>             |
| $U_{\text{Urea-N}}$ | 7.28            | 6.78            | 8.03            | <b>7.36</b>             | 6.99                      | 9.01                      | 8.48                      | <b>8.16</b>                        | 7.90             | 9.03             | 7.06             | <b>7.99</b>              |
| SEM (8)             | 2.19            | 2.06            | 2.51            | <b>2.18</b>             | 2.40                      | 2.47                      | 2.69                      | <b>2.46</b>                        | 2.12             | 2.63             | 2.16             | <b>2.25</b>              |
| UFR                 | 11.27           | 10.57           | 10.37           | <b>10.73</b>            | 8.94                      | 8.86                      | 12.78                     | <b>10.19</b>                       | 11.57            | 13.71            | 11.84            | <b>12.37</b>             |
| SEM (8)             | 1.77            | 2.11            | 2.42            | <b>2.00</b>             | 1.03                      | 1.49                      | 2.17                      | <b>0.87</b>                        | 1.60             | 2.55             | 2.04             | <b>2.03</b>              |

F. Urinary excretion rates ( $\mu\text{mol kg}^{-1} \text{h}^{-1}$ ) of  $\text{Na}^+$  ( $U_{\text{Na}}$ ),  $\text{K}^+$  ( $U_{\text{K}}$ ),  $\text{Cl}^-$  ( $U_{\text{Cl}}$ ), total ammonia ( $U_{\text{Amm}}$ ), and urea-N ( $U_{\text{Urea-N}}$ ), and urine flow rates (UFR) of *A. gigas* subjected to **aerial hyperoxia** (aquatic normoxia) during the experimental treatment period. Hourly values, as well as mean values (in bold) for the 3-h pre-treatment control period, 3-h treatment period, and 3-h post-treatment recovery period are shown. Means  $\pm$  SEM (N). Overall means in 3-h periods not sharing the same letter are significantly different, and asterisks indicate means in 1-h intervals that are significantly different from the overall normoxic control mean ( $P < 0.05$ ).

|                     | 0-1h<br>Control | 1-2h<br>Control | 2-3h<br>Control | <b>Mean<br/>Control</b> | 3-4h<br>Aerial<br>Hyperoxia | 4-5h<br>Aerial<br>Hyperoxia | 5-6h<br>Aerial<br>Hyperoxia | <b>Mean<br/>Aerial<br/>Hyperoxia</b> | 6-7h<br>Recovery | 7-8h<br>Recovery | 8-9h<br>Recovery | <b>Mean<br/>Recovery</b> |
|---------------------|-----------------|-----------------|-----------------|-------------------------|-----------------------------|-----------------------------|-----------------------------|--------------------------------------|------------------|------------------|------------------|--------------------------|
| $U_{\text{Na}}$     | 2.09            | 2.35            | 2.49            | <b>2.31<sup>A</sup></b> | 2.09                        | 2.25                        | 1.84                        | <b>2.06<sup>A</sup></b>              | 0.76*            | 1.55             | 1.01             | <b>1.11<sup>B</sup></b>  |
| SEM (5)             | 0.30            | 0.88            | 1.02            | <b>0.46</b>             | 0.98                        | 0.99                        | 0.97                        | <b>0.98</b>                          | 0.28             | 0.68             | 0.2              | <b>0.30</b>              |
| $U_{\text{K}}$      | 0.92            | 0.86            | 0.91            | <b>0.90</b>             | 0.69                        | 0.80                        | 0.70                        | <b>0.73</b>                          | 0.61             | 0.78             | 0.76             | <b>0.72</b>              |
| SEM (5)             | 0.26            | 0.21            | 0.28            | <b>0.23</b>             | 0.22                        | 0.13                        | 0.15                        | <b>0.17</b>                          | 0.18             | 0.12             | 0.18             | <b>0.14</b>              |
| $U_{\text{Cl}}$     | 1.03            | 1.18            | 1.05            | <b>1.09</b>             | 0.89                        | 1.01                        | 1.05                        | <b>0.98</b>                          | 0.70             | 0.97             | 0.90             | <b>0.86</b>              |
| SEM (5)             | 0.18            | 0.10            | 0.15            | <b>0.12</b>             | 0.31                        | 0.26                        | 0.25                        | <b>0.27</b>                          | 0.14             | 0.16             | 0.15             | <b>0.11</b>              |
| $U_{\text{Amm}}$    | 87.26           | 101.40          | 117.7           | <b>102.1</b>            | 98.00                       | 111.7                       | 85.5                        | <b>98.4</b>                          | 105.12           | 103.22           | 140.00           | <b>116.11</b>            |
| SEM (5)             | 29.94           | 29.05           | 35.83           | <b>30.76</b>            | 34.92                       | 29.61                       | 21.02                       | <b>27.71</b>                         | 36.22            | 33.05            | 55.49            | <b>40.53</b>             |
| $U_{\text{Urea-N}}$ | 5.29            | 10.57           | 10.19           | <b>8.64</b>             | 7.82                        | 9.68                        | 8.53                        | <b>8.67</b>                          | 9.59             | 10.31            | 8.14             | <b>9.34</b>              |
| SEM (5)             | 3.98            | 5.34            | 5.23            | <b>4.67</b>             | 3.61                        | 4.53                        | 4.05                        | <b>3.99</b>                          | 4.09             | 4.15             | 4.47             | <b>4.08</b>              |
| UFR                 | 11.45           | 14.71           | 12.73           | <b>12.97</b>            | 11.10                       | 14.71                       | 13.05                       | <b>12.95</b>                         | 9.36             | 12.04            | 10.60            | <b>10.67</b>             |
| SEM (5)             | 1.86            | 1.74            | 1.69            | <b>1.02</b>             | 3.27                        | 3.07                        | 2.98                        | <b>3.04</b>                          | 1.85             | 1.89             | 2.14             | <b>1.43</b>              |

G. Urinary excretion rates ( $\mu\text{mol kg}^{-1} \text{h}^{-1}$ ) of  $\text{Na}^+$  ( $U_{\text{Na}}$ ),  $\text{K}^+$  ( $U_{\text{K}}$ ),  $\text{Cl}^-$  ( $U_{\text{Cl}}$ ), total ammonia ( $U_{\text{Amm}}$ ), and urea-N ( $U_{\text{Urea-N}}$ ), and urine flow rates (UFR) of *A. gigas* subjected to **aquatic hypoxia** (aerial normoxia) during the experimental treatment period. Hourly values, as well as mean values (in bold) for the 3-h pre-treatment control period, 3-h treatment period, and 3-h post-treatment recovery period are shown. Means  $\pm$  SEM (N). \* indicates significant difference from mean Control value ( $P < 0.05$ ).

|                     | 0-1h Control | 1-2h Control | 2-3h Control | Mean Control  | 3-4h Aquatic Hypoxia | 4-5h Aquatic Hypoxia | 5-6h Aquatic Hypoxia | Mean Aquatic Hypoxia | 6-7h Recovery | 7-8h Recovery | 8-9h Recovery | Mean Recovery |
|---------------------|--------------|--------------|--------------|---------------|----------------------|----------------------|----------------------|----------------------|---------------|---------------|---------------|---------------|
| $U_{\text{Na}}$     | 2.30         | 2.33         | 2.57         | <b>2.40</b>   | 1.93                 | 2.21                 | 2.93                 | <b>2.36</b>          | 2.89          | 4.82          | 3.74          | <b>3.82</b>   |
| SEM (9)             | 1.06         | 1.21         | 1.20         | <b>1.14</b>   | 1.16                 | 1.18                 | 1.21                 | <b>1.16</b>          | 1.24          | 2.19          | 1.31          | <b>1.48</b>   |
| $U_{\text{K}}$      | 1.14         | 1.36         | 2.35         | <b>1.62</b>   | 0.70*                | 0.84*                | 1.11                 | <b>0.88</b>          | 1.16*         | 1.21*         | 1.36          | <b>1.24</b>   |
| SEM (9)             | 0.34         | 0.25         | 1.51         | <b>0.58</b>   | 0.15                 | 0.20                 | 0.14                 | <b>0.14</b>          | 0.30          | 0.27          | 0.30          | <b>0.25</b>   |
| $U_{\text{Cl}}$     | 1.46         | 1.54         | 2.55         | <b>1.76</b>   | 1.28                 | 1.39                 | 1.54                 | <b>1.37</b>          | 1.66          | 2.58          | 1.88          | <b>1.95</b>   |
| SEM (9)             | 0.35         | 0.40         | 0.41         | <b>0.33</b>   | 0.41                 | 0.42                 | 0.48                 | <b>0.43</b>          | 0.44          | 0.85          | 0.52          | <b>0.59</b>   |
| $U_{\text{Amm}}$    | 140.88       | 172.77       | 136.53       | <b>155.67</b> | 74.19*               | 120.21               | 183.58               | <b>126.00</b>        | 157.27        | 149.17        | 158.42        | <b>154.95</b> |
| SEM (9)             | 46.87        | 57.84        | 34.93        | <b>42.47</b>  | 26.22                | 38.29                | 67.55                | <b>41.06</b>         | 44.00         | 45.07         | 53.25         | <b>46.60</b>  |
| $U_{\text{Urea-N}}$ | 3.64         | 0.54         | 5.15         | <b>3.11</b>   | 5.11                 | 6.95                 | 4.63                 | <b>5.56</b>          | 6.42          | 5.55          | 10.18         | <b>7.38</b>   |
| SEM (9)             | 1.54         | 0.25         | 2.77         | <b>1.47</b>   | 2.85                 | 4.11                 | 1.96                 | <b>2.93</b>          | 2.99          | 3.15          | 4.07          | <b>3.31</b>   |
| UFR                 | 13.73        | 12.83        | 13.66        | <b>13.39</b>  | 7.95*                | 10.04                | 13.87                | <b>10.62</b>         | 12.41         | 14.19         | 12.60         | <b>13.07</b>  |
| SEM (9)             | 2.19         | 2.58         | 2.95         | <b>2.31</b>   | 2.51                 | 2.67                 | 2.84                 | <b>2.37</b>          | 1.97          | 3.08          | 2.12          | <b>2.34</b>   |

H. Urinary excretion rates ( $\mu\text{mol kg}^{-1} \text{h}^{-1}$ ) of  $\text{Na}^+$  ( $U_{\text{Na}}$ ),  $\text{K}^+$  ( $U_{\text{K}}$ ),  $\text{Cl}^-$  ( $U_{\text{Cl}}$ ), total ammonia ( $U_{\text{Amm}}$ ), and urea-N ( $U_{\text{Urea-N}}$ ), and urine flow rates (UFR) of *A. gigas* subjected to **aquatic hyperoxia** (aerial normoxia) during the experimental treatment period. Hourly values, as well as mean values (in bold) for the 3-h pre-treatment control period, 3-h treatment period, and 3-h post-treatment recovery period are shown. Means  $\pm$  SEM (N).

|                     | 0-1h<br>Control | 1-2h<br>Control | 2-3h<br>Control | <b>Mean<br/>Control</b> | 3-4h<br>Aquatic<br>Hyperoxia | 4-5h<br>Aquatic<br>Hyperoxia | 5-6h<br>Aquatic<br>Hyperoxia | <b>Mean<br/>Aquatic<br/>Hyperoxia</b> | 6-7h<br>Recovery | 7-8h<br>Recovery | 8-9h<br>Recovery | <b>Mean<br/>Recovery</b> |
|---------------------|-----------------|-----------------|-----------------|-------------------------|------------------------------|------------------------------|------------------------------|---------------------------------------|------------------|------------------|------------------|--------------------------|
| $U_{\text{Na}}$     | 1.90            | 2.16            | 1.77            | <b>1.94</b>             | 0.96                         | 1.43                         | 1.02                         | <b>1.14</b>                           | 1.17             | 1.26             | 1.02             | <b>1.15</b>              |
| SEM (7)             | 0.55            | 0.85            | 0.48            | <b>0.53</b>             | 0.36                         | 0.42                         | 0.37                         | <b>0.35</b>                           | 0.44             | 0.40             | 0.30             | <b>0.38</b>              |
| $U_{\text{K}}$      | 0.62            | 0.69            | 1.07            | <b>0.79</b>             | 0.55                         | 0.59                         | 0.60                         | <b>0.58</b>                           | 0.65             | 0.66             | 0.75             | <b>0.69</b>              |
| SEM (7)             | 0.17            | 0.23            | 0.27            | <b>0.19</b>             | 0.16                         | 0.14                         | 0.16                         | <b>0.15</b>                           | 0.18             | 0.12             | 0.19             | <b>0.15</b>              |
| $U_{\text{Cl}}$     | 1.80            | 1.63            | 1.85            | <b>1.76</b>             | 1.06                         | 1.52                         | 1.31                         | <b>1.30</b>                           | 1.21             | 1.41             | 1.16             | <b>1.26</b>              |
| SEM (7)             | 0.35            | 0.50            | 0.37            | <b>0.28</b>             | 0.25                         | 0.34                         | 0.34                         | <b>0.23</b>                           | 0.31             | 0.22             | 0.17             | <b>0.22</b>              |
| $U_{\text{Amm}}$    | 59.30           | 91.08           | 119.89          | <b>90.09</b>            | 68.28                        | 85.23                        | 73.34                        | <b>75.61</b>                          | 71.50            | 78.91            | 64.90            | <b>71.77</b>             |
| SEM (7)             | 17.65           | 31.57           | 44.74           | <b>27.89</b>            | 19.48                        | 28.13                        | 25.27                        | <b>23.71</b>                          | 24.49            | 24.62            | 23.07            | <b>23.18</b>             |
| $U_{\text{Urea-N}}$ | 8.15            | 6.17            | 12.67           | <b>9.00</b>             | 6.73                         | 8.32                         | 7.86                         | <b>7.64</b>                           | 7.68             | 7.18             | 6.62             | <b>7.16</b>              |
| SEM (7)             | 4.79            | 4.02            | 6.14            | <b>4.56</b>             | 3.47                         | 3.92                         | 4.04                         | <b>3.78</b>                           | 3.97             | 3.86             | 3.66             | <b>3.83</b>              |
| UFR                 | 11.50           | 12.27           | 12.46           | <b>12.08</b>            | 8.82                         | 11.48                        | 9.37                         | <b>9.89</b>                           | 9.39             | 9.69             | 9.56             | <b>9.54</b>              |
| SEM (7)             | 2.93            | 3.57            | 2.56            | <b>2.25</b>             | 2.31                         | 2.21                         | 2.37                         | <b>2.06</b>                           | 2.35             | 1.99             | 2.07             | <b>2.09</b>              |
